1                   **XENOGENEIC FIBROBLASTS INHIBIT THE GROWTH OF BREAST AND**  
2                   **OVARIAN CANCER CELL LINES IN CO-CULTURE**

3  
4 L. Usha<sup>1</sup>, O. Klapko<sup>1</sup> and S. Edassery,<sup>2, a</sup>

5  
6 <sup>1</sup>Division of Hematology, Oncology, and Stem Cell Transplant, Department of Medicine;  
7 <sup>2</sup>Department of Cell and Molecular Medicine, Rush University Medical Center, Chicago, IL  
8 60612;

9  
10  
11 <sup>a</sup> Current address: Northwestern University I Feinberg School of Medicine, Department of  
12 Neurology, Chicago, IL 60611

13  
14  
15 Corresponding author:  
16 Lydia Usha, M.D.  
17 Division of Hematology, Oncology, and Stem Cell Transplant  
18 Department of Medicine  
19 1725 W. Harrison St, Suite 809  
20 Chicago, IL 60612  
21 Phone: (312) 942-5904  
22 [lydia\\_usha@rush.edu](mailto:lydia_usha@rush.edu)  
23 ORCID ID 0000-0001-5968-5487  
24

25  
26 **Running title:** xenogeneic fibroblasts inhibit cancer cell growth *in vitro*  
27

28

29 **ABSTRACT**

30 Cell-based therapies cure some hematologic malignancies, although little information exists on  
31 solid cancer cell responses. The study objective was to test the hypothesis that xenogeneic  
32 fibroblasts can inhibit the growth of human cancer cell lines *in vitro*. Seven human cell lines  
33 (pancreatic cancer HPAF II; brain cancer U-87 MG; fibrosarcoma; ovarian cancer OVCAR3 and  
34 SKOV3; and breast cancer MCF7 and MDA-MB231) were co-cultured with two xenogeneic  
35 fibroblast cell lines (CV-1; monkey, *Cercopithecus aethiops* and DF-1; chicken, *Gallus gallus*) in  
36 a transwell culture system. Cancer cell proliferation was assessed colorimetrically. Different  
37 concentrations of breast and ovarian cancer cells were tested. Gene expression induced by DF-1  
38 xenogeneic fibroblasts was assessed by RNAseq of MCF7 breast cancer cells. The proliferation  
39 of the majority of the cancer cell lines was altered by co-culture with xenogeneic fibroblasts.  
40 Cell proliferation was increased (4-17%) by CV-1; DF-1 increased brain cancer cell proliferation  
41 (16%), decreased breast and ovarian cancer cell growth (15 and 26% respectively) but did not  
42 affect fibrosarcoma and pancreatic cancer cells. When the initial cancer cell concentrations were  
43 lowered 4-fold, growth inhibition of breast and ovarian cancer increased more than 2-fold. DF-1  
44 fibroblasts induced significant differential expression of 484 genes in MCF7 breast cancer cells;  
45 285 genes were down-regulated and 199 genes were upregulated compared to control. Genes  
46 involved in the immune response were the major downregulated entities. RNAseq results were  
47 validated by qRT-PCR of 12 genes. The results show that xenogeneic fibroblasts can alter the  
48 growth and gene expression of cancer cells *in vitro*. This suggests a potentially novel  
49 investigational approach to the control of cancer cell growth.

50

51

52

53

54

55

56

57 Keywords: xenogeneic fibroblasts, cancer cell lines, breast cancer, ovarian cancer, RNAseq

58

59

60

## 61 INTRODUCTION

62 Metastatic cancer remains a lethal disease despite numerous advances in cancer treatment.  
63 Although existing cancer treatments such as surgery, radiotherapy, and chemotherapy can  
64 achieve a cure in some early-stage cancers, they have only a palliative effect in advanced  
65 cancers. In addition, they often have complications and toxicities. For some malignancies with a  
66 single gene defect, treatment progress and sometimes a cure is achieved by "targeted" drugs such  
67 as the PARP inhibitor olaparib for ovarian cancer in women with germline BRCA mutations [1,  
68 2] and imatinib which targets BCR-ABL tyrosine kinase in Philadelphia chromosome-positive  
69 chronic myelogenous leukemia [3]. However, in the majority of cases, the common epithelial  
70 malignancies (e.g., colon, breast, lung, liver, pancreas and ovary) have multiple genetic  
71 alterations that often involve deletion and amplification of large parts of the genome, as well as  
72 complex and interacting cellular and molecular networks. Consequently, the success of single-  
73 target therapies or even their combinations is often limited.

74 A potential alternative to targeted therapies is cytotherapy. Cytotherapy has been successfully  
75 used to treat cancer. Although commonly used in experimental conditions cells include  
76 mesenchymal stem cells (MSC) and fibroblasts, a variety of other cells were investigated [4, 5].  
77 For example, CAR-T (chimeric antigen receptor) cell therapy was recently developed and FDA-  
78 approved for some forms of leukemia [6].

79  
80 Xenogeneic cytotherapies have shown some promise. Xenogeneic cells have the potential to  
81 stimulate the immune system to overcome tumor immunosuppression [7-9]. An influx of  
82 immune cells and tumor regression occurred in patients with solid metastatic tumors in a Phase I  
83 clinical trial in which xenogeneic African green monkey fibroblasts, engineered to produce  
84 human IL-2, were administered intratumorally [10]. Likewise, targeted cytotherapy for  
85 pancreatic cancer using naïve, non-engineered rat umbilical cord matrix derived stem cells to  
86 control the growth of pancreatic cancer, strongly attenuated the growth of pancreatic carcinoma  
87 cells *in vitro* and *in vivo* in a peritoneal mouse model [11]. Xenogeneic immunization with  
88 tyrosine hydroxylase-derived DNA vaccines was effective against neuroblastoma in mice [12].  
89 In a human clinical trial performed in Russia, irradiated xenogeneic murine cell vaccines were  
90 effective in breaking the immune tolerance to human tumor-associated antigens in human  
91 colorectal cancer [13].

92  
93 One appeal of cell therapy is that cells may express and secrete thousands of biologically active  
94 molecules which could interfere with malignant growth. Also, specific cells, such as stem cells  
95 or fibroblasts, can migrate to the corresponding tissue/organ ("homing") or at least in the case of  
96 mesenchymal stem cells, to the site of injury, inflammation or cancer [14, 15]. Once "homed" to  
97 the tumor, xenogeneic fibroblasts can potentially elicit a robust immune response to the tumor.  
98 Cancer-associated fibroblasts play a fundamental role in modulating the behavior of cancer cells  
99 and cancer progression [15, 16]. There is evidence for both pro- and anti-tumor actions of  
100 cancer-associated fibroblasts [17]. Interestingly, normal human and murine fibroblasts inhibit  
101 the proliferation and motility of prostate tumor cell lines when co-cultured *in vitro* [18]. This  
102 effect involved both cell contact with fibroblast monolayers and fibroblast secreted  
103 biomolecules.

104 The objective of the study was to assess the effect of xenogeneic fibroblasts on cancer cells in  
105 order to test the hypothesis that xenogeneic fibroblast cell lines can inhibit the growth of human  
106 cancer cell lines *in vitro*. The approach was to use a simplified system of exposing cancer cells  
107 to xenogeneic fibroblasts *in vitro* in which cells are separated in a transwell system. Cancer cell  
108 growth and molecular expression changes in cancer cells were examined.

109

110

## 111 METHODS

112

### 113 Cell Culture

114

115 All cell lines were obtained from the American Type Culture Collection (ATCC; Manassas,  
116 VA). The two fibroblast cell lines included UMNSAH/DF-1 (henceforward designated DF-1)  
117 derived from normal *Gallus gallus* (chicken) embryo fibroblasts (ATCC CRL12203) and CV-1  
118 derived from normal *Cercopithecus aethiops* (African green monkey) kidney fibroblasts (ATCC  
119 CCL70). The seven human cancer cell lines included those from pancreatic cancer HPAF II  
120 (ATCC CRL1997); brain cancer U-87 MG (ATCC HTB14); fibrosarcoma (ATCC CCL121);  
121 ovarian cancer OVACAR3 (ATCC HTB161) and SKOV3 (ATCC HTB77); and breast cancer  
122 MCF7 (ATCC HTB22) and MDA-MB231 (ATCC HTB26). After experiments at a fixed  
123 starting cancer cell concentration, the two breast cancer cell lines and two ovarian cancer cell  
124 lines were selected to explore the effects of initial cancer cell concentrations on growth effects in  
125 co-culture with the chicken embryo-derived fibroblast cell line. The breast cancer cell lines were  
126 estrogen and progesterone receptor-positive (MCF7) or estrogen and progesterone-negative  
127 (MDA-MB231); ovarian cancer cell lines included a p53 mutant cell line (OVCAR3) and a p53  
128 wild-type cell line (SKOV3).

129

130 Cells were cultured in Eagles Essential minimum media (ATCC) containing 10% fetal bovine  
131 serum (FBS) (Sigma; St. Louis, MO) in a humidified incubator (5% CO<sub>2</sub>) at 37°C. Cancer cells  
132 were co-cultured with fibroblast cell lines using a transwell system (Greiner Bio-one Thincert™;  
133 Monroe, NC) with fibroblasts layered in the upper well (Figure 1). Cancer cells were seeded at  
134 4x10<sup>4</sup> cells/well/800 µl of media and fibroblast cells in the insert at 2x10<sup>4</sup> cells/300 µl media. As  
135 a control, the matching cancer cells were used in both the well and insert with the cancer cells in  
136 the insert at 2x10<sup>4</sup> cells/300 µl media.

137

138 Cultures were monitored for mycoplasma contamination. Also, RNA sequencing data were  
139 analyzed for mycoplasma sequences. The data were uploaded into the Galaxy server, four  
140 million reads from each file were selected using the "split file tool," and the split FASTQ  
141 sequencing file aligned using "Bowtie2" against three mycoplasma fasta sequences (*M.*  
142 *fermentans* M64, *M. hominis* ATCC 23114 and *M. hyorhinae* MCLD) commonly found in cell  
143 cultures [19]. No alignment with the mycoplasma sequences was found, supporting a lack of  
144 mycoplasma contamination.

145

### 146 Cell Growth

147

148 After five days, the growth of the cancer cells was measured using the MTT (3-(4,5-  
149 dimethylthiazol-2-yl)-2,5-diphenyltetrazolium bromide) cell proliferation assay. The reduction of  
150 yellow tetrazolium dye (MTT) by living cells produces purple formazan crystals. In brief, the  
151 inserts were removed, and 80µl of 5 mg/ml MTT reagent (MP Biomedicals; Santa Ana, CA) was  
152 added to each well and incubated for 4 hours. The media was removed, and the intracellular  
153 formazan solubilized by adding 500 µl of DMSO (Sigma; St. Louis, MO) and incubating for 30  
154 minutes at room temperature. Optical density was read at 560 nm with a reference wavelength of  
155 650 nm using an Epoch spectrophotometer (BioTek Instruments; Winooski, VT). The percent  
156 change in growth compared to the control incubations was calculated. The experiment was

157 repeated three times for cell growth assays and RNA extraction. The data were analyzed using  
158 the Student's t-test with  $p < 0.05$  considered significant.

159

## 160 **RNA Extraction**

161

162 The effect of the DF-1 fibroblast cell line on gene expression changes in human MCF7 breast  
163 cancer cells was determined. The media was removed after co-culture for five days, and the  
164 culture wells were washed with cold phosphate-buffered saline (PBS). RNA was extracted with  
165 100  $\mu$ l of Trizol per well, triplicate wells were pooled, and the Trizol extractions continued  
166 according to the manufacturer's protocol. Precipitated RNA was solubilized in 40  $\mu$ l of molecular  
167 biology grade water (RPI Research Products; Mount Prospect, IL) and stored at  $-80^{\circ}\text{C}$ . RNA  
168 quantity and quality was measured in a NanoDrop Spectrophotometer. Novogene checked RNA  
169 integrity with an Agilent 2100 analyzer, and RNA degradation was assessed by gel  
170 electrophoresis before subjecting the sample to Next-Generation sequencing.

171

## 172 **Next-Generation Sequencing**

173

174 The extracted RNA was sent to Novogen Inc. (Davis, CA) for sequencing. cDNA libraries were  
175 made from the RNA as per the in-house Novogene protocol. Paired-end (PE-150bp) sequencing  
176 was performed using the Illumina sequencing platform; each RNA sample was sequenced to  
177 obtain at least 40 million reads per sample. The RNA sequence data was "cleaned" using the  
178 NOVOGENE default protocol to remove the adapter sequences, reads containing more than 10%  
179 N (sequence not determined) and reads with a low-quality Phred score (Q Score  $\leq 5$ )  
180 (Supplementary Table 1).

181

182 The cleaned data was uploaded to Galaxy (<https://usegalaxy.org/>) for analysis. Sequence  
183 count per gene was determined using the "Salmon" method in Galaxy. The Salmon program  
184 quantifies the expression of transcripts from RNAseq data; it indexes, quantifies, and provides  
185 the count per each transcript aligned to the reference genome [19]. The count files from each  
186 sample are merged into one list and uploaded to the Degust webserver for differential gene  
187 expression (DE) analysis between groups. The data was further filtered to remove "no count"  
188 transcripts by using criteria of at least one count per transcript in all samples. EdgeR  
189 implemented in the Degust (<http://degust.erc.monash.edu/>) was used to identify differentially  
190 expressed genes (FDR = 0.01 and absolute log fold change =  $\pm 0.5$ ), using the quasi-likelihood  
191 functionality of edgeR; DE genes lists were analyzed further for functional enrichment using the  
192 "Reactome pathway browser" at <https://reactome.org/PathwayBrowser/>.

193

## 194 **qRT-PCR**

195

196 Examples of differentially expressed genes were selected for confirmation and validation:  
197 interleukin 1 receptor, type I, cysteine-rich secretory protein 3, KIT ligand, selectin L, G protein-  
198 coupled estrogen receptor 1, protein kinase C, delta, interleukin 1 receptor antagonist, chemokine  
199 (C-X-C motif) ligand 12, CD36 molecule (thrombospondin receptor), B-cell CLL/lymphoma 2,  
200 Janus kinase 2, and interleukin 18. The qRT PCR primers were designed using NCBI primer  
201 blast. One microgram of total RNA was treated with DNASE (Thermo Fischer; Waltham, MA)  
202 to remove any genomic DNA contamination according to the manufacturer's standard protocol.

203 Five hundred ng of DNASE treated RNA was used for the first-strand synthesis using an ABI  
204 high-capacity cDNA reverse transcription kit (Applied Biosystems; Foster City, CA). qRT-PCR  
205 was carried out using Fast Sybr green (ABI). Ct values were exported, and the ddCt value was  
206 used to calculate fold change in differential expression.

207

## 208 **RESULTS**

### 209 **Cell growth**

210 The proliferation of the majority of the cancer cell lines was altered by transwell co-culture with  
211 xenogeneic fibroblast cell lines.

212 Specifically, CV-1 fibroblasts increased the proliferation of brain cancer cells by 12%, OVCAR3  
213 ovarian cancer cells by 13.5% and fibrosarcoma cells by 11% compared to control. These  
214 changes were significant ( $p < 0.05$ ). The growth of the pancreatic cancer cell line increased 20%  
215 in two out of three experiments, while growth of the MCF7 breast cancer cell line did not  
216 increase significantly (Figure 2A).

217 DF-1 fibroblasts had mixed effects on cancer cell line growth. Brain cancer cell proliferation  
218 increased 16%. The growth of MCF7 breast cancer cells was reduced 25% and OVCAR3  
219 ovarian cancer cell growth was reduced by 14% compared to control ( $p < 0.05$ ). The pancreatic  
220 cancer and the fibrosarcoma cell lines showed no significant growth change in co-culture with  
221 either fibroblast cell line (Figure 2B).

222 To assess the effect of different initial cancer cell concentration (10,000, 20,000 and 40,000) on  
223 cell growth in the presence of xenogeneic fibroblasts, proliferation was examined for the breast  
224 and ovarian cancer cell lines in co-culture with DF-1 fibroblasts. Inhibition was higher overall at  
225 lower starting cell concentrations (Figure 3) except for OVCAR3 where inhibition was higher at  
226 the highest cell concentration. Thus the growth effects differed between the two ovarian cancer  
227 cell lines. The pattern was similar for either breast cancer cell lines regardless of estrogen and  
228 progesterone receptor absence (e.g., MDA-MB231 cells) or presence (e.g., MCF7 cells).

### 229 **Gene Expression**

230 Gene expression was examined in the MCF breast cancer cell line in response to DF-1  
231 fibroblasts. Overall, 484 genes were significantly differentially expressed; of these, 285 genes  
232 were down-regulated and 199 genes were up-regulated compared to control. The results of  
233 Reactome analysis show the major functional pathways that are differentially up-regulated  
234 (Table 1A) and down regulated (Table 1B). Immune pathway genes ( $n = 101$  entities found)  
235 were the major over-represented group among the downregulated genes. Among the upregulated  
236 genes those involved in developmental pathways were the most overrepresented genes ( $n=27$   
237 entities found). An MA plot of the distribution of significantly up and down-regulated genes is  
238 shown in Figure 4.

239 To validate the RNA sequencing data, 12 genes with a significant fold change in expression were  
240 chosen and quantified by qRT-PCR. The results of qRT-PCR supported those obtained from  
241 transcriptome analysis and demonstrated a similar up- or down-regulation of the genes (Table 2).

242

243



## 244 **DISCUSSION**

245 The proliferation of a majority of the cancer cell lines was altered by co-culture with xenogeneic  
246 fibroblasts. The direction of the effect varied with different cell combinations. The DF-1  
247 chicken embryo-derived fibroblast cell line most effectively inhibited breast and ovarian cancer  
248 cell lines. Associated genomic changes in breast cancer cells showed that in addition to the  
249 expected changes in proliferation and differentiation pathways, downregulation of components  
250 of immune system pathways was the most dramatic change of the cancer cells.

251 These findings are significant since cancer-associated fibroblasts are an active component of the  
252 tumor microenvironment and they coordinate interactions between the cancer cells and stromal  
253 cells [15, 17]. Fibroblasts are known to remodel tumor stroma and can have pro- and anti-tumor  
254 effects [16, 21]. In this study, the difference between monkey and chicken fibroblasts effects on  
255 cell growth could be due to a number of factors. Aside from the obvious difference in species  
256 origin, the monkey fibroblasts are from adult kidney while chicken fibroblasts were from  
257 embryos that are pluripotent and could produce a different and greater range of active factors.  
258 Interestingly, exposure to embryonic microenvironment(s) of chicken or zebrafish reprograms  
259 human melanoma cells and inhibits tumor development [22]. Fibroblasts are a dominant  
260 component of tumor stroma and play a key role in regulating the anti-tumor immune response  
261 [5]. Thus, the results of RNA-seq in this study are consistent with a major effect on immune  
262 system pathways.

263 Immunotherapy became an important new development in treatment of multiple malignancies  
264 and after more than 100 years of basic research and clinical trials, finally proved that  
265 manipulating the host immune system can lead to a clinically significant anti-tumor effect.  
266 However, the percentage of patients with advanced solid tumors who achieve a durable response  
267 or cure from immunotherapy remains small [23]. Immunotherapy employs monoclonal  
268 antibodies to biomarkers present on immune cells such as PD-L1 or CTLA-4 [23], and assumes  
269 all relevant targets are addressed. A potential advantage of cell therapy is that multiple factors  
270 are produced by therapeutic cells, which could address multiple targets.

271 Xenogeneic cell and organ transplantation has been used to replace damaged cells in Parkinson's  
272 disease (DA neurons), diabetes (islets) and liver and heart failure [7]. Xenogeneic cell  
273 transplantation has been proposed as a therapeutic approach to re-activate anti-tumor immunity  
274 and restore impaired function [7]. Various cell types and preparations have been used as a  
275 cancer therapy [8]. Human, mouse and rat MSCs transfected with various vectors (e.g. viruses,  
276 transposon-based gene vectors) attenuated growth of different tumors targeted by each individual  
277 genetically engineered group of MSCs [24]. A composite xenogeneic polyantigenic vaccine  
278 prepared from murine melanoma B16 and carcinoma LLC cells increased survival and tumor  
279 immunity (e.g., increased T cell responses to human Caco-2 colon adenocarcinoma-associated  
280 antigens) in stage IV colorectal cancer patients [13]. Xenogeneic monkey fibroblasts (Vero  
281 cells) genetically engineered to produce human IL-2 were administered intra-tumorally; this  
282 treatment was associated with an anti-tumor effect [10]. A vaccine using xenogeneic whole  
283 endothelial cells effectively inhibited tumor growth, induced regression of established tumors  
284 and prolonged survival of tumor-bearing mice [9]. Fibroblasts inhibited cancer cell growth in  
285 co-culture; this inhibition varied depending on the source and the site of origin of the fibroblasts  
286 [18].

287 Caveats and considerations for this study are related to the heterogeneity of fibroblast functions.  
288 A uniform effect of fibroblasts was not expected since subsets of cancer associated fibroblasts  
289 have cancer-suppressing or cancer-promoting functions [15, 16]. Furthermore, fibroblasts have  
290 intrinsic cellular plasticity and exhibit heterogeneity in tumors [25]. Activated fibroblasts, which  
291 have similar features to mesenchymal stromal cells, may be capable of reprogramming into  
292 different lineages, including endothelial cells, adipocytes, and chondrocytes [17]. The function  
293 of the co-cultured fibroblasts may differ when paired with different cell lines. A future study  
294 would reveal the effect of fibroblasts in direct contact with cancer cells in co-culture.

295 Finally, this simplified system was used to gain knowledge of the effect of xenogeneic  
296 fibroblasts on cancer cells. However, it does not include the complex interactions that might  
297 occur *in vivo*; in other words, would the chicken fibroblast cell line drive the same response *in*  
298 *situ*? While there is interest in the development of fibroblast-targeted cancer therapies, the  
299 complexities of fibroblast-cancer cell interactions remain to be adequately understood before  
300 novel therapies targeting or exploiting fibroblasts can be implemented [5].

### 301 **CONCLUSION**

302 The results of the studies showed that xenogeneic fibroblasts can inhibit proliferation of human  
303 ovarian and breast cancer cells *in vitro*. Furthermore, this growth inhibition was associated with  
304 differential expression of genes and genomic pathways involved in cell proliferation,  
305 differentiation, and immune function. Thus, the co-culture experiments suggest that xenogeneic  
306 cells may affect not only tumor cell growth and differentiation, but also, their interactions with  
307 immune system.

308 Future directions will include analysis of biomolecules secreted by chicken embryonic  
309 fibroblasts in paracrine fashion in co-culture. These biomolecules may have human homologs  
310 with potential utility in cancer treatment. We are also planning to explore this phenomenon  
311 further *in vivo* using animal models.

312

313

### 314 **Acknowledgments**

315 We are indebted to Dr. Judith Luborsky for assistance in manuscript preparation. We would also  
316 like to acknowledge the generous contributions of Mr. and Mrs. Eugene and Shirley Deutsch,  
317 Mr. and Mrs. Mark and Maha Halabi Ditsch, Mr. George Ruwe, Clow Family Foundation, and  
318 Eisenbrandt Family Foundation.

319

320

## 321 REFERENCES

- 322 [1] ROBSON M, IM S-A, SENKUS E, XU B, DOMCHEK SM et al. Olaparib for metastatic breast  
323 cancer in patients with a germline brca mutation. *New England Journal of Medicine* 2017; 377:  
324 523-533. DOI: 10.1056/NEJMoa1706450
- 325 [2] AUDEH MW, CARMICHAEL J, PENSON RT, FRIEDLANDER M, POWELL B et al. Oral  
326 poly(adp-ribose) polymerase inhibitor olaparib in patients with brca1 or brca2 mutations and  
327 recurrent ovarian cancer: A proof-of-concept trial. *Lancet* 2010; 376: 245-251. DOI:  
328 10.1016/S0140-6736(10)60893-8
- 329 [3] IQBAL N, IQBAL N. Imatinib: A breakthrough of targeted therapy in cancer. *Chemother Res*  
330 *Pract* 2014; 2014: 357027. DOI: 10.1155/2014/357027
- 331 [4] CHRISTODOULOU I, GOULIELMAKI M, DEVETZI M, PANAGIOTIDIS M, KOLIAKOS G  
332 et al. Mesenchymal stem cells in preclinical cancer cytotherapy: A systematic review. *Stem Cell*  
333 *Research & Therapy* 2018; 9: 336. DOI: 10.1186/s13287-018-1078-8
- 334 [5] LIU T, HAN C, WANG S, FANG P, MA Z et al. Cancer-associated fibroblasts: An emerging  
335 target of anti-cancer immunotherapy. *Journal of Hematology & Oncology* 2019; 12: 86. DOI:  
336 10.1186/s13045-019-0770-1
- 337 [6] ANDROULLA NM, LEFKOTHEA CP. Car t-cell therapy: A new era in cancer immunotherapy.  
338 *Current Pharmaceutical Biotechnology* 2018; 19: 5-18. DOI:  
339 <http://dx.doi.org/10.2174/1389201019666180418095526>
- 340 [7] HUANG CP, CHEN CC, SHYR CR. Xenogeneic cell therapy provides a novel potential  
341 therapeutic option for cancers by restoring tissue function, repairing cancer wound and reviving  
342 anti-tumor immune responses. *Cancer Cell Int* 2018; 18: 9. DOI: 10.1186/s12935-018-0501-7
- 343 [8] STRIOGA MM, DARINSKAS A, PASUKONIENE V, MLYNSKA A, OSTAPENKO V et al.  
344 Xenogeneic therapeutic cancer vaccines as breakers of immune tolerance for clinical application:  
345 To use or not to use? *Vaccine* 2014; 32: 4015-4024. DOI: 10.1016/j.vaccine.2014.05.006
- 346 [9] WEI YQ, WANG QR, ZHAO X, YANG L, TIAN L et al. Immunotherapy of tumors with  
347 xenogeneic endothelial cells as a vaccine. *Nat Med* 2000; 6: 1160-1166. DOI: 10.1038/80506
- 348 [10] TARTOUR E, MEHTALI M, SASTRE-GARAU X, JOYEUX I, MATHIOT C et al. Phase i  
349 clinical trial with il-2-transfected xenogeneic cells administered in subcutaneous metastatic  
350 tumours: Clinical and immunological findings. *Br J Cancer* 2000; 83: 1454-1461. DOI:  
351 10.1054/bjoc.2000.1492
- 352 [11] DOI C, MAURYA DK, PYLE MM, TROYER D, TAMURA M. Cytotherapy with naive rat  
353 umbilical cord matrix stem cells significantly attenuates growth of murine pancreatic cancer cells  
354 and increases survival in syngeneic mice. *Cytotherapy* 2010; 12: 408-417. DOI:  
355 10.3109/14653240903548194
- 356 [12] HUEBENER N, FEST S, HILT K, SCHRAMM A, EGGERT A et al. Xenogeneic immunization  
357 with human tyrosine hydroxylase DNA vaccines suppresses growth of established neuroblastoma.  
358 *Mol Cancer Ther* 2009; 8: 2392-2401. DOI: 10.1158/1535-7163.MCT-09-0107
- 359 [13] SELEDTSOVA GV, SHISHKOV AA, KASCHENKO EA, SELEDTSOV VI. Xenogeneic cell-  
360 based vaccine therapy for colorectal cancer: Safety, association of clinical effects with vaccine-  
361 induced immune responses. *Biomed Pharmacother* 2016; 83: 1247-1252. DOI:  
362 10.1016/j.biopha.2016.08.050
- 363 [14] SOHNI A, VERFAILLIE CM. Mesenchymal stem cells migration homing and tracking. *Stem*  
364 *Cells Int* 2013; 2013: 130763. DOI: 10.1155/2013/130763
- 365 [15] FIORI ME, DI FRANCO S, VILLANOVA L, BIANCA P, STASSI G et al. Cancer-associated  
366 fibroblasts as abettors of tumor progression at the crossroads of emt and therapy resistance. *Mol*  
367 *Cancer* 2019; 18: 70. DOI: 10.1186/s12943-019-0994-2
- 368 [16] LIU T, ZHOU L, LI D, ANDL T, ZHANG Y. Cancer-associated fibroblasts build and secure the  
369 tumor microenvironment. *Front Cell Dev Biol* 2019; 7: 60. DOI: 10.3389/fcell.2019.00060

- 370 [17] LEBLEU VS, KALLURI R. A peek into cancer-associated fibroblasts: Origins, functions and  
371 translational impact. *Dis Model Mech* 2018; 11. DOI: 10.1242/dmm.029447
- 372 [18] ALKASALIAS T, FLABERG E, KASHUBA V, ALEXEYENKO A, PAVLOVA T et al.  
373 Inhibition of tumor cell proliferation and motility by fibroblasts is both contact and soluble factor  
374 dependent. *Proc Natl Acad Sci U S A* 2014; 111: 17188-17193. DOI: 10.1073/pnas.1419554111
- 375 [19] DREXLER HG, UPHOFF CC. Mycoplasma contamination of cell cultures: Incidence, sources,  
376 effects, detection, elimination, prevention. *Cytotechnology* 2002; 39: 75-90. DOI:  
377 10.1023/A:1022913015916
- 378 [20] PATRO R, DUGGAL G, LOVE MI, IRIZARRY RA, KINGSFORD C. Salmon provides fast and  
379 bias-aware quantification of transcript expression. *Nat Methods* 2017; 14: 417-419. DOI:  
380 10.1038/nmeth.4197
- 381 [21] FLABERG E, MARKASZ L, PETRANYI G, STUBER G, DICSŐ F et al. High-throughput live-  
382 cell imaging reveals differential inhibition of tumor cell proliferation by human fibroblasts.  
383 *International Journal of Cancer* 2011; 128: 2793-2802. DOI: 10.1002/ijc.25612
- 384 [22] HENDRIX MJC, SEFTOR EA, SEFTOR REB, KASEMEIER-KULESA J, KULESA PM et al.  
385 Reprogramming metastatic tumour cells with embryonic microenvironments. *Nature Reviews*  
386 *Cancer* 2007; 7: 246. DOI: 10.1038/nrc2108
- 387 [23] NIXON NA, BLAIS N, ERNST S, KOLLMANNNSBERGER C, BEBB G et al. Current landscape  
388 of immunotherapy in the treatment of solid tumours, with future opportunities and challenges.  
389 *Curr Oncol* 2018; 25: e373-e384. DOI: 10.3747/co.25.3840
- 390 [24] BAO Q, ZHAO Y, NIESS H, CONRAD C, SCHWARZ B et al. Mesenchymal stem cell-based  
391 tumor-targeted gene therapy in gastrointestinal cancer. *Stem Cells Dev* 2012; 21: 2355-2363.  
392 DOI: 10.1089/scd.2012.0060
- 393 [25] EYDEN B. Fibroblast phenotype plasticity: Relevance for understanding heterogeneity in  
394 "fibroblastic" tumors. *Ultrastructural Pathology* 2004; 28: 307-319. DOI:  
395 10.1080/019131290882204

396

397

398

399

400

401

402

403

404

405

406

407

408

409

410

411

412

## FIGURE LEGENDS

413 **Figure 1.** Diagram of transwell used for co-culture of fibroblasts and cancer cell lines

414 Legend: In the experimental wells, cancer cells were seeded in the lower chamber and fibroblasts were  
415 seeded in the upper well. In the control wells the same cancer cells were seeded in the top and bottom  
416 wells without added fibroblast cell lines. Upper wells contained  $2 \times 10^4$  cells/300  $\mu$ l media.

417

418 **Figure 2.** Xenogeneic fibroblast cell lines alter cancer cell growth in co-culture

419 Legend: The proliferation of a majority of the cancer cell lines was increased significantly ( $p < 0.05$ ) in  
420 the presence of CV-1 fibroblasts (monkey; *C. aethiops*) (upper panel). The percent change in growth is  
421 shown for brain cancer (HTB14 cells), ovarian cancer (HTB161 line of OVACR3 cells), fibrosarcoma  
422 (CCL121 cells) and pancreatic cancer (HPAF II and CRL1997 cells) compared to the control. The small  
423 increase in the breast cancer cell line MCF7 (HTB22) growth was not significant.

424 The DF-1 (chicken; *G.gallus*) embryo-derived fibroblast cell line had mixed effects on the cancer cell  
425 lines (lower panel); the growth of brain cancer increased but the growth of breast cancer MCF7 (HTB22)  
426 and OVCAR3 was reduced compared to the control ( $p < 0.05$ ). The pancreatic cancer cell line (HPAF II,  
427 CRL1997) and the fibrosarcoma cell line (CCL121) showed no significant change in response to DF-1  
428 cells.

429 All experimental wells were seeded at  $4 \times 10^4$  cancer cells/well/800  $\mu$ l of media along with  $2 \times 10^4$  cells/300  
430  $\mu$ l media fibroblast cells in the transwell insert. Controls consisted of adding matched cancer cells to the  
431 transwell.

432

433 **Figure 3.** Cancer cell concentration and inhibition of their growth by chicken embryo-derived fibroblast

434 Legend: Inhibition of cancer cell line growth by DF-1, (chicken; *G.gallus*) embryo-derived fibroblast cell  
435 line, is greater at lower initial cancer cell numbers.

436

437 **Figure 4.** MA plot of significantly up- and downregulated genes in response to DF-1 fibroblasts

438 Legend: MA plot shows the distribution of significantly ( $p < 0.05$ ) up- and downregulated genes in  
439 response to DF-1 xenogeneic fibroblasts as a fold change (FC) in expression.

440

## TABLE LEGENDS

441 **Table 1.** Selected genes from Reactome analysis with altered expression by RNAseq of the MCF7 breast  
442 cancer cell line in response to DF-1 xenogeneic fibroblasts are shown. There were more (B)  
443 downregulated (n=285) than (A) upregulated (n=199) entities. The top 10 with up- or downregulated  
444 expression are shown. Overall the p values were more significant for downregulated genes. The major  
445 changes in expression in the cancer cells involved the immune system.

446

447 **Table 2.** Changes in expression of selected genes seen in next generation sequencing (NGS) were  
448 confirmed by qPCR.

449 **Table 1.** Selected genes in MCF7 breast cancer cell line with altered expression after exposure to DF-1  
 450 fibroblasts

451 **A. Upregulated Genes**

| Pathway ID    | Pathway name                                                          | Entities |       |         |       |
|---------------|-----------------------------------------------------------------------|----------|-------|---------|-------|
|               |                                                                       | # found  | total | p Value | FDR   |
| R-HSA-428540  | Activation of RAC1                                                    | 3        | 15    | 0.001   | 0.227 |
| R-HSA-1266738 | Developmental Biology                                                 | 27       | 1176  | 0.005   | 0.292 |
| R-HSA-5617472 | Activation of hindbrain anterior HOX genes during early embryogenesis | 6        | 116   | 0.005   | 0.292 |
| R-HSA-5619507 | Activation of HOX genes during differentiation                        | 6        | 116   | 0.005   | 0.292 |
| R-HSA-8985586 | SLIT2:ROBO1 increases RHOA activity                                   | 2        | 8     | 0.006   | 0.292 |
| R-HSA-8937144 | Aryl hydrocarbon receptor signaling                                   | 2        | 8     | 0.006   | 0.292 |
| R-HSA-428543  | Inactivation of CDC42 and RAC1                                        | 2        | 12    | 0.012   | 0.490 |
| R-HSA-2559585 | Oncogene Induced Senescence                                           | 3        | 42    | 0.020   | 0.508 |
| R-HSA-419037  | NCAM1 interactions                                                    | 3        | 44    | 0.023   | 0.508 |
| R-HSA-9018681 | Biosynthesis of protectins                                            | 2        | 18    | 0.025   | 0.508 |

452

453 **B. Downregulated Genes**

| Pathway ID    | Pathway name                                                               | Entities |         |          |          |
|---------------|----------------------------------------------------------------------------|----------|---------|----------|----------|
|               |                                                                            | # Found  | Total # | P value  | FDR      |
| R-HSA-983170  | Antigen Presentation: Folding, assembly and peptide loading of class I MHC | 56       | 102     | 1.11E-16 | 6.99E-15 |
| R-HSA-1280215 | Cytokine Signaling in Immune system                                        | 81       | 1051    | 1.11E-16 | 6.99E-15 |
| R-HSA-913531  | Interferon Signaling                                                       | 67       | 388     | 1.11E-16 | 6.99E-15 |
| R-HSA-198933  | Immunoregulatory interactions between a Lymphoid and a non-Lymphoid cell   | 56       | 316     | 1.11E-16 | 6.99E-15 |
| R-HSA-1280218 | Adaptive Immune System                                                     | 62       | 999     | 3.20E-10 | 1.82E-08 |
| R-HSA-9018519 | Estrogen-dependent gene expression                                         | 20       | 153     | 8.08E-09 | 4.28E-07 |
| R-HSA-8939211 | ESR-mediated signaling                                                     | 20       | 160     | 1.67E-08 | 8.04E-07 |
| R-HSA-9006931 | Signaling by Nuclear Receptors                                             | 23       | 230     | 7.93E-08 | 3.57E-06 |
| R-HSA-168256  | Immune System                                                              | 101      | 2638    | 3.74E-05 | 0.001    |
| R-HSA-1474228 | Degradation of the extracellular matrix                                    | 12       | 148     | 6.72E-04 | 0.021    |

454

455

**Table 2.** The difference in expression of selected genes in MCF7 breast cancer cell line after exposure to DF-1 fibroblasts <sup>456</sup>

| Gene                                  | NGS fold change | qRT PCR fold change |
|---------------------------------------|-----------------|---------------------|
| interleukin 1 receptor, type I        | 2.86            | 2.93                |
| cysteine-rich secretory protein 3     | 1.72            | 2.21                |
| KIT ligand                            | 1.64            | 2.20                |
| selectin L                            | 1.52            | 1.62                |
| G protein-coupled estrogen receptor 1 | 1.49            | 1.48                |
| protein kinase C, delta               | 1.41            | 1.72                |
| interleukin 1 receptor antagonist     | -3.13           | -1.75               |
| chemokine (C-X-C motif) ligand 12     | -2.27           | -1.75               |
| CD36 molecule (thrombospondin         | -1.92           | -1.77               |
| B-cell CLL/lymphoma 2                 | -1.89           | -1.74               |
| Janus kinase 2                        | -1.79           | -1.60               |
| interleukin 18                        | -1.79           | -1.60               |

457

458

Figure 1 The experiment schema

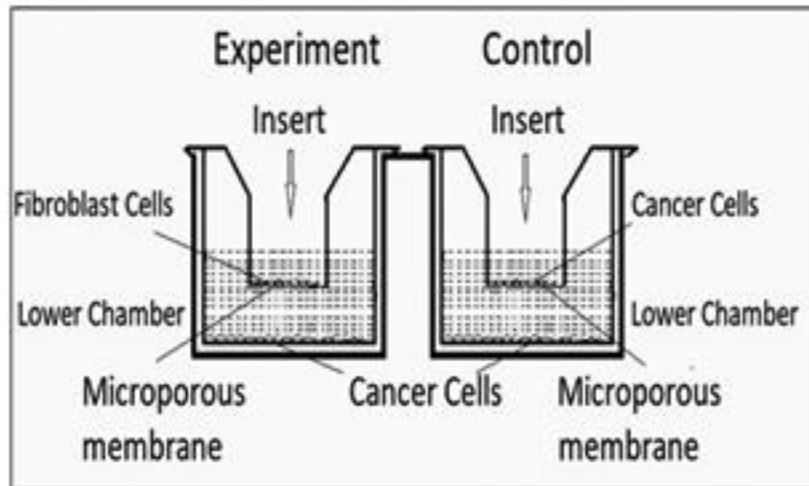



**Figure 2.**

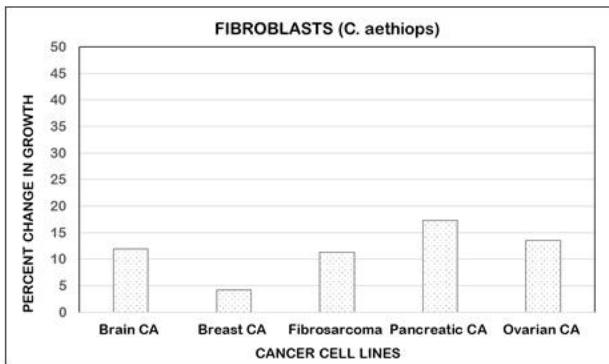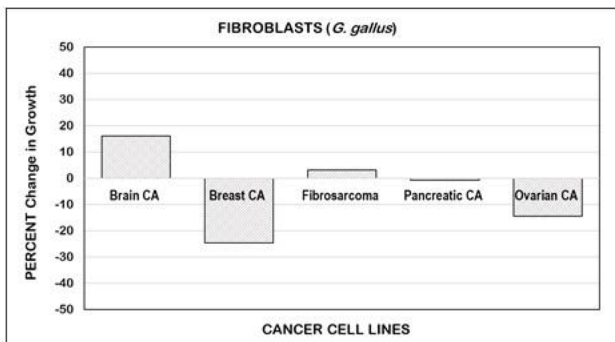

**Figure 3.**

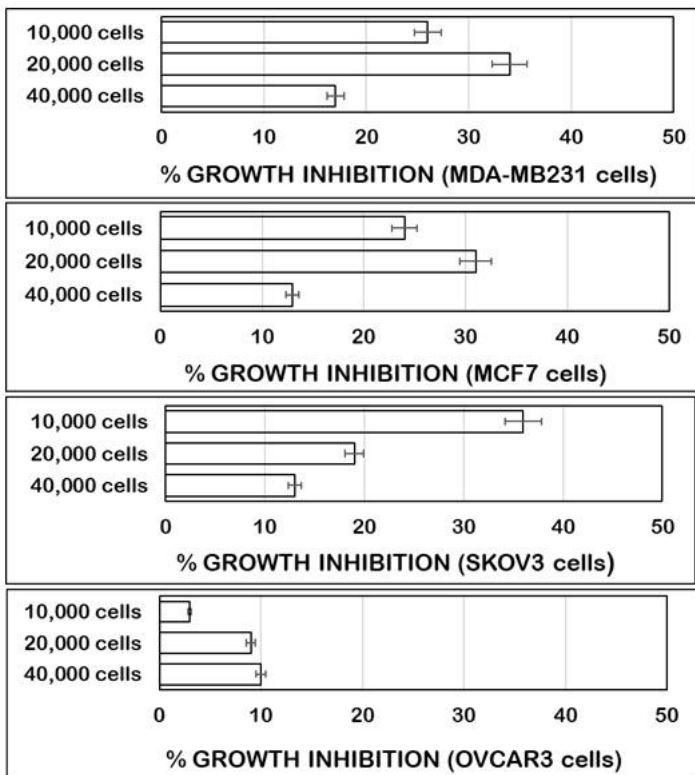

Figure 4.

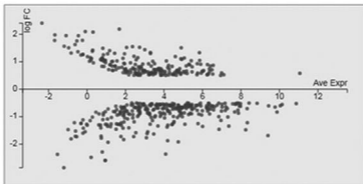

Source: https://www.biorxiv.org/content/10.1101/2021.07.19.452126v1.full.pdf
